# Supplementary material for: A smart enzyme reactor based on a photo-responsive hydrogel for purifying water from phenol contaminated sources
Source: Royal Society of Chemistry journal article supplement (doi:10.1039/d1sm01536b), 2021-12-09
Supplement: d1sm01536b1.pdf [file d1sm01536b1.pdf]

# Smart Enzyme Reactor Based on a Photo-responsive Hydrogel for Purifying Water from Phenol Contaminated Sources

*Yuqi Gu, Siyuan Luo, Yaya Wang, Xuhui Zhu and Shun Yang\**

School of Chemistry and Materials Science, Jiangsu Normal University, Xuzhou,  
Jiangsu, 221116, China

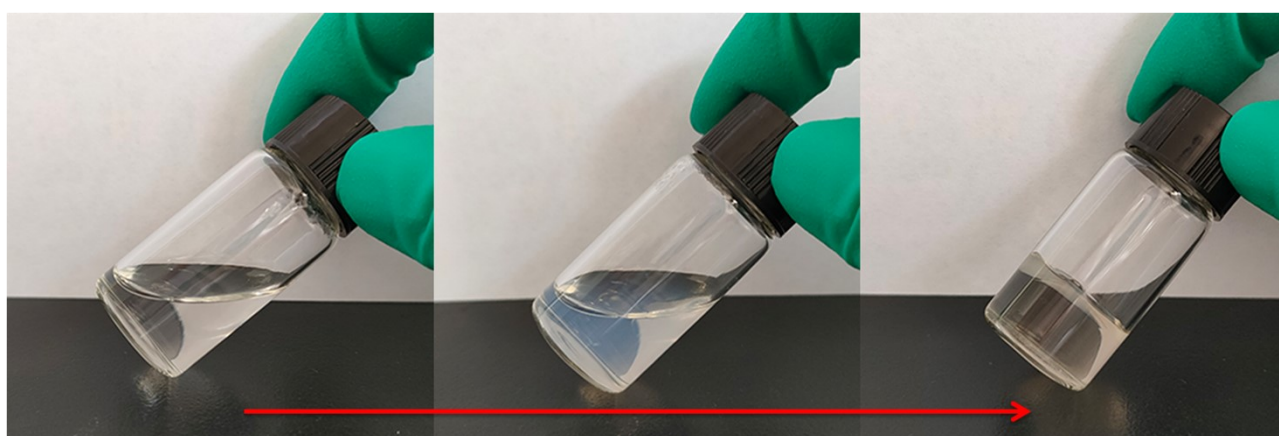

**Fig. S1** Optical images of the successful preparation PNIPAm microgels and  
PNIPAm hydrogel..

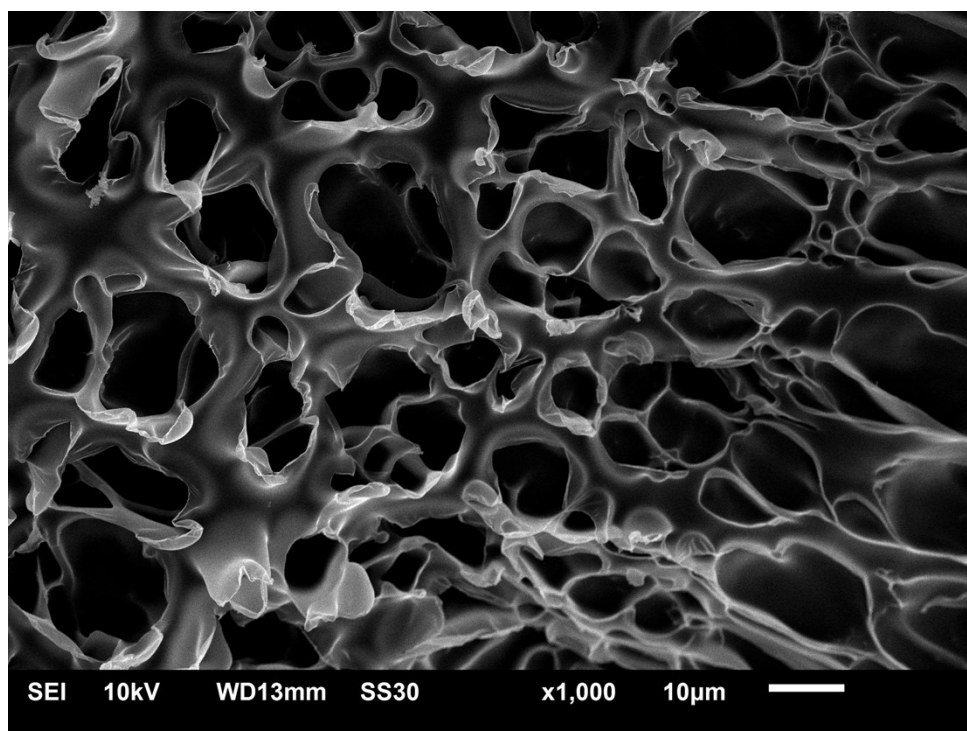

**Fig. S2** SEM image of PNIPAm hydrogel.

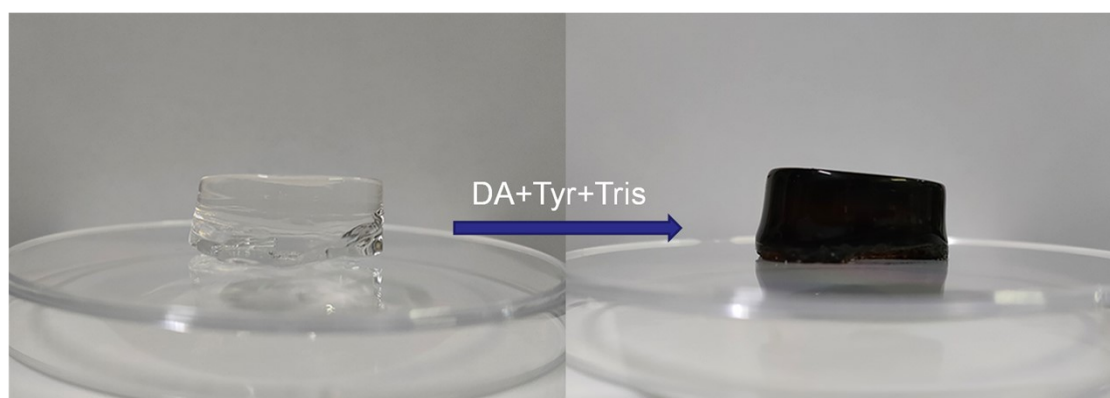

**Fig. S3** Change of gel color (form transparent to black)

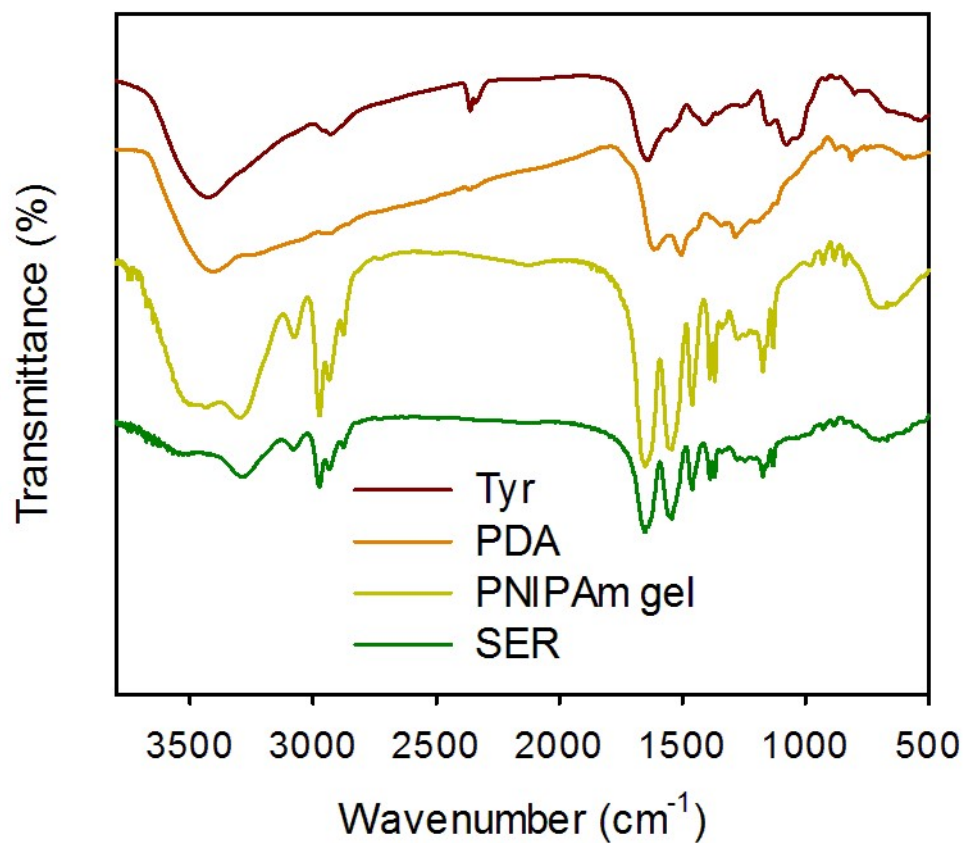

**Fig. S4** Fourier transform infrared spectrum of Tyr, PDA PNIPAm gel and SER.

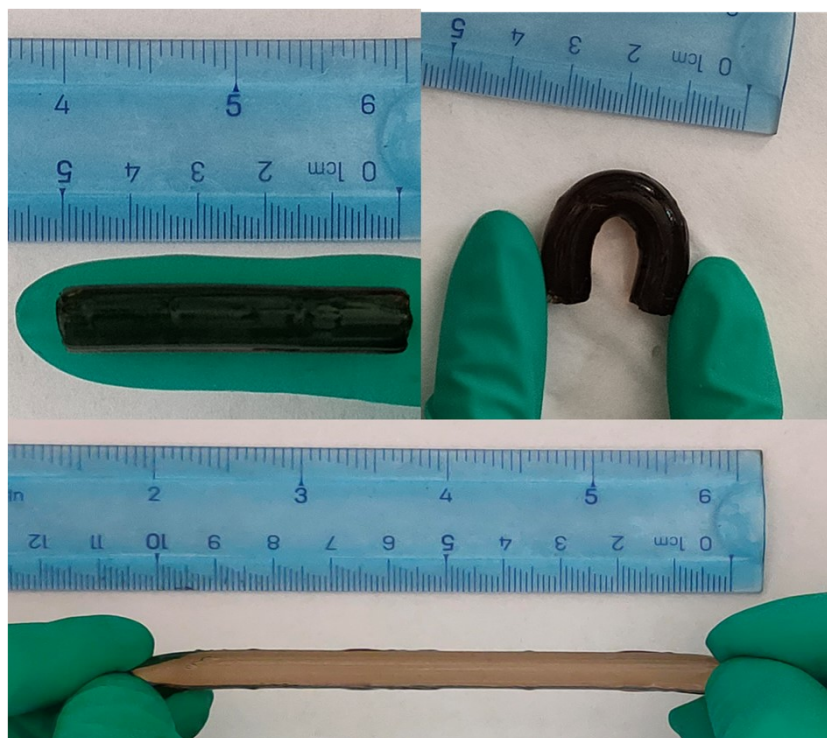

**Fig. S5** Optical images of bended and stretched SER.

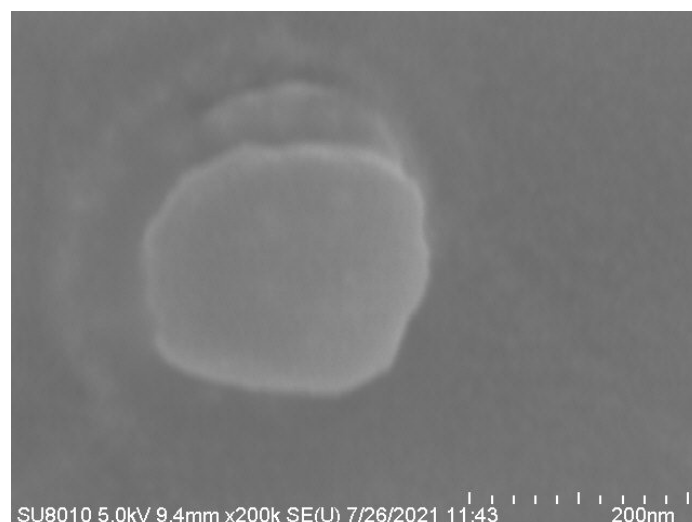

**Fig. S6** SEM image of PDA-Tyr complexes.

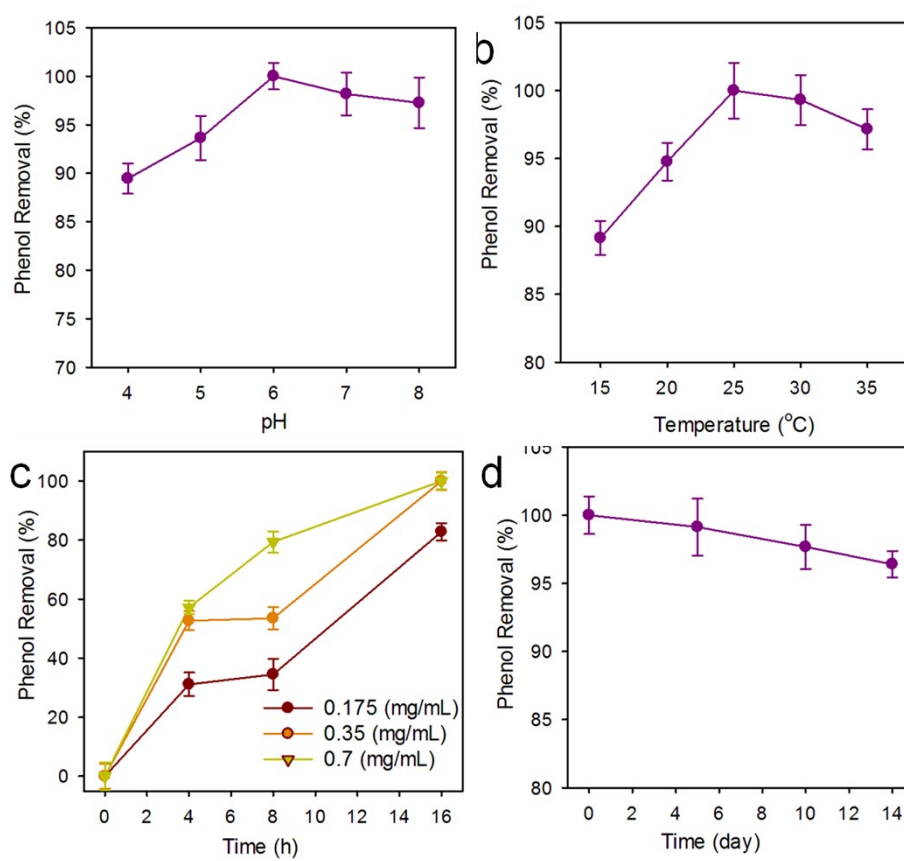

**Fig. S7** Effects of different pH values (a), temperatures (b), Tyr dosage (c) and storage time (d) on phenol removal efficiency of SER.
